# Supplementary material for: Glucagon-Like Peptide 1 Receptor Agonists and the Risk of Incident Diabetic Retinopathy
Source: Oxford University Press journal article supplement (doi:10.2337/dc17-2280), 2018-08-27

## Table of Contents

- Supplemental Table 1. ICD-10 codes and Read codes for diabetic retinopathy
- Supplemental Table 2. Crude and adjusted hazard ratios for the association between the use of individual GLP-1 receptor agonists compared with the use of  $\geq 2$  oral antidiabetic drugs and the risk of diabetic retinopathy
- Supplemental Table 3. Adjusted hazard ratios for the association between the use of GLP-1 receptor agonists compared with the use of  $\geq 2$  oral antidiabetic drugs and the risk of diabetic retinopathy (interaction with duration of treated diabetes)
- Supplemental Table 4. Adjusted hazard ratios for the association between the use of GLP-1 receptor agonists compared with the use of  $\geq 2$  oral antidiabetic drugs and the risk of diabetic retinopathy (interaction with hemoglobin A1c levels)
- Supplemental Table 5. Adjusted hazard ratios for the association between the use of GLP-1 receptor agonists compared with the use of  $\geq 2$  oral antidiabetic drugs and the risk of diabetic retinopathy (interaction with arterial hypertension\*)
- Supplemental Table 6. Adjusted hazard ratios for the association between the use of GLP-1 receptor agonists compared with the use of  $\geq 2$  oral antidiabetic drugs and the risk of diabetic retinopathy (interaction with use of ACE inhibitors or ARBs)
- Supplemental Table 7. Crude and adjusted hazard ratios for the association between the use of GLP-1 receptor agonists compared with the use of  $\geq 2$  oral antidiabetic drugs and the risk of diabetic retinopathy (90-day grace period)
- Supplemental Table 8. Crude and adjusted hazard ratios for the association between the use of GLP-1 receptor agonists compared with the use of  $\geq 2$  oral antidiabetic drugs and the risk of diabetic retinopathy (additionally adjusting for use of antidiabetic drugs in the year prior to cohort entry)
- Supplemental Table 9. Crude and adjusted hazard ratios for the association between the use of GLP-1 receptor agonists compared with the use of  $\geq 2$  oral antidiabetic drugs and the risk of diabetic retinopathy (excluding thiazolidinedione users from the 2 main exposure categories)
- Supplemental Table 10. Crude and adjusted hazard ratios for the association between the use of GLP-1 receptor agonists compared with the use of  $\geq 2$  oral antidiabetic drugs and the risk of diabetic retinopathy (multiple imputation for missing values)
- Supplemental Table 11. Crude and adjusted hazard ratios for the association between the use of GLP-1 receptor agonists compared with the use of  $\geq 2$  oral antidiabetic drugs and the risk of diabetic retinopathy (competing risk analysis)
- Supplemental Table 12. Crude and adjusted hazard ratios for the association between the use of GLP-1 receptor agonists compared with the use of  $\geq 2$  oral antidiabetic drugs and the risk of diabetic retinopathy (stratification on high-dimensional disease risk score deciles)

## SUPPLEMENTARY DATA

Supplemental Table 13. Crude and adjusted hazard ratios for the association between the use of GLP-1 receptor agonists compared with the use of  $\geq 2$  oral antidiabetic drugs and the risk of diabetic retinopathy in patients without screening for diabetic retinopathy in the year prior to cohort entry

Supplemental Table 14. Crude and adjusted hazard ratios for the association between the use of GLP-1 receptor agonists compared with the use of  $\geq 2$  oral antidiabetic drugs and the risk of diabetic retinopathy in patients with screening for diabetic retinopathy in the year prior to cohort entry

Supplemental Table 15. Bounds on corrected estimates and 95% confidence intervals for unmeasured confounding (sensitivity analysis without assumptions)\*

Supplemental Table 16. Baseline demographics and clinical characteristics of the cohort and stratified by used of DPP-4 inhibitors and insulin at cohort entry

Supplemental Table 17. Crude and adjusted hazard ratios for the association between the use of DPP-4 inhibitors compared with the use of  $\geq 2$  oral antidiabetic drugs and the risk of diabetic retinopathy

Supplemental Table 18. Crude and adjusted hazard ratios for the association between the use of insulin compared with the use of  $\geq 2$  oral antidiabetic drugs and the risk of diabetic retinopathy

Supplemental Table 19. Baseline demographics and clinical characteristics of new users of GLP-1 receptor agonists and new users of insulin

Supplemental Figure 1. Forest plot summarizing the primary analysis and the analyses using negative (DPP-4 inhibitors) and positive control (insulin) exposures.

Supplemental Figure 2. Flowchart describing the construction of the study cohort for the ancillary analysis including new users of GLP-1 receptor agonists and new users of insulin

Supplemental Figure 3. Incidence rate of diabetic retinopathy in the base cohort according to duration of treated diabetes

## SUPPLEMENTARY DATA

**Supplementary Table 1. ICD-10 codes and Read codes for diabetic retinopathy**

| <b>ICD-10 code</b> | <b>Description</b>   | <b>Read code</b> | <b>Description</b>                                                |
|--------------------|----------------------|------------------|-------------------------------------------------------------------|
| H36.0              | Diabetic retinopathy | F420.00          | Diabetic retinopathy                                              |
|                    |                      | F420000          | Background diabetic retinopathy                                   |
|                    |                      | 2BBP.00          | O/E - right eye background diabetic retinopathy                   |
|                    |                      | 2BBQ.00          | O/E - left eye background diabetic retinopathy                    |
|                    |                      | F420400          | Diabetic maculopathy                                              |
|                    |                      | F420100          | Proliferative diabetic retinopathy                                |
|                    |                      | 2BBW.00          | O/E - right eye diabetic maculopathy                              |
|                    |                      | 2BBX.00          | O/E - left eye diabetic maculopathy                               |
|                    |                      | 7276             | Pan retinal photocoagulation for diabetes                         |
|                    |                      | F420200          | Preproliferative diabetic retinopathy                             |
|                    |                      | 2BBL.00          | O/E - diabetic maculopathy present both eyes                      |
|                    |                      | 2BBR.00          | O/E - right eye preproliferative diabetic retinopathy             |
|                    |                      | 2BBS.00          | O/E - left eye preproliferative diabetic retinopathy              |
|                    |                      | 2BBT.00          | O/E - right eye proliferative diabetic retinopathy                |
|                    |                      | F420z00          | Diabetic retinopathy NOS                                          |
|                    |                      | F420.00          | Diabetic retinopathy                                              |
|                    |                      | 2BBV.00          | O/E - left eye proliferative diabetic retinopathy                 |
|                    |                      | C10F600          | Type 2 diabetes mellitus with retinopathy                         |
|                    |                      | 2BBF.00          | Retinal abnormality - diabetes related                            |
|                    |                      | F420300          | Advanced diabetic maculopathy                                     |
|                    |                      | C108700          | Insulin dependent diabetes mellitus with retinopathy              |
|                    |                      | C10FQ00          | Type 2 diabetes mellitus with exudative maculopathy               |
|                    |                      | F420500          | Advanced diabetic retinal disease                                 |
|                    |                      | C109600          | Non-insulin-dependent diabetes mellitus with retinopathy          |
|                    |                      | 2BBk.00          | O/E - right eye stable treated proliferative diabetic retinopathy |
|                    |                      | 2BBl.00          | O/E - left eye stable treated proliferative diabetic retinopathy  |
|                    |                      | 2BBo.00          | O/E - sight threatening diabetic retinopathy                      |
|                    |                      | F420700          | High risk proliferative diabetic retinopathy                      |
|                    |                      | C10F611          | Type II diabetes mellitus with retinopathy                        |
|                    |                      | F420800          | High risk non proliferative diabetic retinopathy                  |
|                    |                      | C109611          | Type II diabetes mellitus with retinopathy                        |
|                    |                      | C109612          | Type 2 diabetes mellitus with retinopathy                         |
|                    |                      | C10E712          | Insulin dependent diabetes mellitus with retinopathy              |
|                    |                      | 2BBr.00          | Impaired vision due to diabetic retinopathy                       |

Abbreviations: ICD-10, International Statistical Classification of Diseases and Health-Related Problems, Tenth Revision; O/E, on examination

SUPPLEMENTARY DATA

**Supplementary Table 2. Crude and adjusted hazard ratios for the association between the use of individual GLP-1 receptor agonists compared with the use of  $\geq 2$  oral antidiabetic drugs and the risk of diabetic retinopathy**

| Exposure <sup>a</sup>                    | Events | Person-years | Incidence rate <sup>b</sup> (95% CI) | Crude HR (95% CI)   | Adjusted HR (95% CI) <sup>c</sup> |
|------------------------------------------|--------|--------------|--------------------------------------|---------------------|-----------------------------------|
| $\geq 2$ oral antidiabetic drugs         | 2386   | 48,692       | 49.0 (47.1 to 51.0)                  | 1.00 [Reference]    | 1.00 [Reference]                  |
| Exenatide only                           | 75     | 1915         | 39.2 (30.8 to 49.1)                  | 0.84 (0.67 to 1.06) | 0.89 (0.70 to 1.12)               |
| Liraglutide only                         | 92     | 2219         | 41.5 (33.4 to 50.8)                  | 0.98 (0.79 to 1.21) | 1.10 (0.89 to 1.35)               |
| <b><math>\leq 6</math> months of use</b> |        |              |                                      |                     |                                   |
| $\geq 2$ oral antidiabetic drugs         | 1203   | 23,473       | 51.3 (48.4 to 54.2)                  | 1.00 [Reference]    | 1.00 [Reference]                  |
| Exenatide                                | 36     | 1093         | 32.9 (23.1 to 45.6)                  | 0.71 (0.51 to 0.98) | 0.74 (0.53 to 1.03)               |
| Liraglutide                              | 49     | 1180         | 41.5 (30.7 to 54.9)                  | 1.00 (0.75 to 1.33) | 1.12 (0.84 to 1.49)               |
| <b>6.1-12 months of use</b>              |        |              |                                      |                     |                                   |
| $\geq 2$ oral antidiabetic drugs         | 394    | 8586         | 45.9 (41.5 to 50.7)                  | 1.00 [Reference]    | 1.00 [Reference]                  |
| Exenatide                                | 21     | 344          | 61.0 (37.8 to 93.3)                  | 1.37 (0.88 to 2.12) | 1.45 (0.94 to 2.26)               |
| Liraglutide                              | 24     | 454          | 52.9 (33.9 to 78.7)                  | 1.25 (0.83 to 1.88) | 1.39 (0.92 to 2.11)               |
| <b>&gt;12 months of use</b>              |        |              |                                      |                     |                                   |
| $\geq 2$ oral antidiabetic drugs         | 789    | 16,633       | 47.4 (44.2 to 50.9)                  | 1.00 [Reference]    | 1.00 [Reference]                  |
| Exenatide                                | 18     | 478          | 37.7 (22.3 to 59.5)                  | 0.83 (0.52 to 1.32) | 0.89 (0.55 to 1.41)               |
| Liraglutide                              | 19     | 585          | 32.5 (19.6 to 50.7)                  | 0.77 (0.49 to 1.21) | 0.86 (0.54 to 1.35)               |

*P for heterogeneity for exenatide = 0.10*

*P for heterogeneity for liraglutide = 0.32*

Abbreviations: HR, hazard ratio; GLP-1, glucagon-like peptide-1; CI, confidence interval; BMI, Body mass index

<sup>a</sup> Use of other antidiabetic agents is considered in the model, but not presented in the table.

<sup>b</sup> Per 1000 persons per year.

<sup>c</sup> Adjusted for year of cohort entry, age, sex, quintiles of the Index of Multiple Deprivation, alcohol-related disorders, smoking status, BMI category, hemoglobin A1c, systolic and diastolic blood pressure, dyslipidemia, duration of treated diabetes, neuropathy, nephropathy, peripheral arteriopathy, myocardial infarction, ischemic stroke, history of cataract surgery, albuminuria or proteinuria, uveitis, sickle disease, use of statins, fibrates, antihypertensive drugs, ophthalmic agents, antimalarial drugs, fluconazole, tamoxifen, the number of non-antidiabetic drugs, and the number of physician visits.

# SUPPLEMENTARY DATA

**Supplementary Table 3. Adjusted hazard ratios for the association between the use of GLP-1 receptor agonists compared with the use of ≥2 oral antidiabetic drugs and the risk of diabetic retinopathy (interaction with duration of treated diabetes)**

| Exposure <sup>a</sup>       | Duration of treated diabetes <5 years<br>Adjusted HR (95% CI) <sup>b</sup> | Duration of treated diabetes ≥5 years<br>Adjusted HR (95% CI) <sup>b</sup> | P for interaction |
|-----------------------------|----------------------------------------------------------------------------|----------------------------------------------------------------------------|-------------------|
| ≥2 oral antidiabetic drugs  | 1.00 (reference)                                                           | 1.00 (reference)                                                           |                   |
| GLP-1 receptor agonists     | 0.99 (0.82 to 1.20)                                                        | 1.08 (0.81 to 1.43)                                                        | 0.08              |
| <b>≤6 months of use</b>     |                                                                            |                                                                            |                   |
| ≥2 oral antidiabetic drugs  | 1.00 (reference)                                                           | 1.00 (reference)                                                           |                   |
| GLP-1 receptor agonists     | 0.91 (0.70 to 1.18)                                                        | 1.19 (0.80 to 1.76)                                                        | 0.01              |
| <b>6.1-12 months of use</b> |                                                                            |                                                                            |                   |
| ≥2 oral antidiabetic drugs  | 1.00 (reference)                                                           | 1.00 (reference)                                                           |                   |
| GLP-1 receptor agonists     | 1.53 (1.07 to 2.18)                                                        | 1.18 (0.66 to 2.12)                                                        | 0.01              |
| <b>&gt;12 months of use</b> |                                                                            |                                                                            |                   |
| ≥2 oral antidiabetic drugs  | 1.00 (reference)                                                           | 1.00 (reference)                                                           |                   |
| GLP-1 receptor agonists     | 0.80 (0.53 to 1.20)                                                        | 0.91 (0.53 to 1.57)                                                        | 0.01              |

Abbreviations: HR, hazard ratio; GLP-1, glucagon-like peptide-1; CI, confidence interval; BMI, Body mass index

<sup>a</sup> Use of other antidiabetic agents is considered in the model, but not presented in the table.

<sup>b</sup> Adjusted for year of cohort entry, age, sex, quintiles of the Index of Multiple Deprivation, alcohol-related disorders, smoking status, BMI category, hemoglobin A1c, systolic and diastolic blood pressure, dyslipidemia, neuropathy, nephropathy, peripheral arteriopathy, myocardial infarction, ischemic stroke, history of cataract surgery, albuminuria or proteinuria, uveitis, sickle disease, use of statins, fibrates, antihypertensive drugs, ophthalmic agents, antimalarial drugs, fluconazole, tamoxifen, the number of non-antidiabetic drugs, and the number of physician visits.

# SUPPLEMENTARY DATA

**Supplementary Table 4. Adjusted hazard ratios for the association between the use of GLP-1 receptor agonists compared with the use of ≥2 oral antidiabetic drugs and the risk of diabetic retinopathy (interaction with hemoglobin A1c levels)**

| Exposure <sup>a</sup>      | ≤7.0%                             | 7.1%-8.0%                         | >8.0%                             | P for interaction |
|----------------------------|-----------------------------------|-----------------------------------|-----------------------------------|-------------------|
|                            | Adjusted HR (95% CI) <sup>b</sup> | Adjusted HR (95% CI) <sup>b</sup> | Adjusted HR (95% CI) <sup>b</sup> |                   |
| ≥2 oral antidiabetic drugs | 1.00 [Reference]                  | 1.00 [Reference]                  | 1.00 [Reference]                  |                   |
| GLP-1 receptor agonists    | 0.78 (0.19-3.24)                  | 0.69 (0.22-2.19)                  | 1.29 (0.80-2.10)                  | 0.53              |

Abbreviations: HR, hazard ratio; GLP-1, glucagon-like peptide-1; CI, confidence interval; BMI, Body mass index

\* Arterial hypertension defined as systolic blood pressure ≥ 140 mmHg or diastolic blood pressure ≥ 90mmHg or use of any antihypertensive medication

<sup>a</sup> Use of other antidiabetic agents is considered in the model, but not presented in the table.

<sup>b</sup> Adjusted for year of cohort entry, age, sex, quintiles of the Index of Multiple Deprivation, alcohol-related disorders, smoking status, BMI category, hemoglobin A1c, systolic and diastolic blood pressure, dyslipidemia, neuropathy, nephropathy, peripheral arteriopathy, myocardial infarction, ischemic stroke, history of cataract surgery, albuminuria or proteinuria, uveitis, sickle disease, use of statins, fibrates, antihypertensive drugs, ophthalmic agents, antimalarial drugs, fluconazole, tamoxifen, the number of non-antidiabetic drugs, and the number of physician visits.

# SUPPLEMENTARY DATA

**Supplementary Table 5. Adjusted hazard ratios for the association between the use of GLP-1 receptor agonists compared with the use of ≥2 oral antidiabetic drugs and the risk of diabetic retinopathy (interaction with arterial hypertension\*)**

| Exposure <sup>a</sup>       | Without arterial hypertension<br>Adjusted HR (95% CI) <sup>b</sup> | With arterial hypertension<br>Adjusted HR (95% CI) <sup>b</sup> | P for interaction |
|-----------------------------|--------------------------------------------------------------------|-----------------------------------------------------------------|-------------------|
| ≥2 oral antidiabetic drugs  | 1.00 [Reference]                                                   | 1.00 [Reference]                                                |                   |
| GLP-1 receptor agonists     | 0.76 (0.56-1.03)                                                   | 1.12 (0.94-1.35)                                                | <i>0.0013</i>     |
| <b>≤6 months of use</b>     |                                                                    |                                                                 |                   |
| ≥2 oral antidiabetic drugs  | 1.00 [Reference]                                                   | 1.00 [Reference]                                                |                   |
| GLP-1 receptor agonists     | 0.76 (0.50-1.14)                                                   | 1.04 (0.80-1.34)                                                | <i>0.0152</i>     |
| <b>6.1-12 months of use</b> |                                                                    |                                                                 |                   |
| ≥2 oral antidiabetic drugs  | 1.00 [Reference]                                                   | 1.00 [Reference]                                                |                   |
| GLP-1 receptor agonists     | 1.09 (0.61-1.96)                                                   | 1.61 (1.13-2.30)                                                | <i>0.0152</i>     |
| <b>&gt;12 months of use</b> |                                                                    |                                                                 |                   |
| ≥2 oral antidiabetic drugs  | 1.00 [Reference]                                                   | 1.00 [Reference]                                                |                   |
| GLP-1 receptor agonists     | 0.54 (0.27-1.10)                                                   | 0.97 (0.67-1.41)                                                | <i>0.0152</i>     |

Abbreviations: HR, hazard ratio; GLP-1, glucagon-like peptide-1; CI, confidence interval; BMI, Body mass index

\* Arterial hypertension defined as systolic blood pressure ≥ 140 mmHg or diastolic blood pressure ≥ 90mmHg or use of any antihypertensive medication

<sup>a</sup> Use of other antidiabetic agents is considered in the model, but not presented in the table.

<sup>b</sup> Adjusted for year of cohort entry, age, sex, quintiles of the Index of Multiple Deprivation, alcohol-related disorders, smoking status, BMI category, hemoglobin A1c, systolic and diastolic blood pressure, dyslipidemia, neuropathy, nephropathy, peripheral arteriopathy, myocardial infarction, ischemic stroke, history of cataract surgery, albuminuria or proteinuria, uveitis, sickle disease, use of statins, fibrates, antihypertensive drugs, ophthalmic agents, antimalarial drugs, fluconazole, tamoxifen, the number of non-antidiabetic drugs, and the number of physician visits

# SUPPLEMENTARY DATA

**Supplementary Table 6. Adjusted hazard ratios for the association between the use of GLP-1 receptor agonists compared with the use of ≥2 oral antidiabetic drugs and the risk of diabetic retinopathy (interaction with use of ACE inhibitors or ARBs)**

| Exposure <sup>a</sup>      | Without ACE inhibitors or ARBs    | With ACE inhibitors or ARBs       | P for interaction |
|----------------------------|-----------------------------------|-----------------------------------|-------------------|
|                            | Adjusted HR (95% CI) <sup>b</sup> | Adjusted HR (95% CI) <sup>b</sup> |                   |
| ≥2 oral antidiabetic drugs | 1.00 [Reference]                  | 1.00 [Reference]                  | 0.0137            |
| GLP-1 receptor agonists    | 0.89 (0.69-1.14)                  | 1.08 (0.89-1.32)                  |                   |
| ≤6 months of use           |                                   |                                   |                   |
| ≥2 oral antidiabetic drugs | 1.00 [Reference]                  | 1.00 [Reference]                  | 0.0486            |
| GLP-1 receptor agonists    | 0.89 (0.64-1.25)                  | 0.99 (0.75-1.32)                  |                   |
| 6.1-12 months of use       |                                   |                                   |                   |
| ≥2 oral antidiabetic drugs | 1.00 [Reference]                  | 1.00 [Reference]                  | 0.0486            |
| GLP-1 receptor agonists    | 1.34 (0.83-2.18)                  | 1.50 (1.02-2.21)                  |                   |
| >12 months of use          |                                   |                                   |                   |
| ≥2 oral antidiabetic drugs | 1.00 [Reference]                  | 1.00 [Reference]                  | 0.0486            |
| GLP-1 receptor agonists    | 0.59 (0.32-1.07)                  | 1.00 (0.68-1.48)                  |                   |

Abbreviations: HR, hazard ratio; GLP-1, glucagon-like peptide-1; ACE, angiotensin-converting enzyme; ARBs, angiotensin receptor blockers; CI, confidence interval; BMI, Body mass index

<sup>a</sup> Use of other antidiabetic agents is considered in the model, but not presented in the table.

<sup>b</sup> Adjusted for year of cohort entry, age, sex, quintiles of the Index of Multiple Deprivation, alcohol-related disorders, smoking status, BMI category, hemoglobin A1c, systolic and diastolic blood pressure, dyslipidemia, neuropathy, nephropathy, peripheral arteriopathy, myocardial infarction, ischemic stroke, history of cataract surgery, albuminuria or proteinuria, uveitis, sickle disease, use of statins, fibrates, antihypertensive drugs, ophthalmic agents, antimalarial drugs, fluconazole, tamoxifen, the number of non-antidiabetic drugs, and the number of physician visits



# SUPPLEMENTARY DATA

**Supplementary Table 7. Crude and adjusted hazard ratios for the association between the use of GLP-1 receptor agonists compared with the use of ≥2 oral antidiabetic drugs and the risk of diabetic retinopathy (90-day grace period)**

| Exposure <sup>a</sup>       | Events | Person-years | Incidence rate <sup>b</sup> (95% CI) | Crude HR (95% CI)   | Adjusted HR (95% CI) <sup>c</sup> |
|-----------------------------|--------|--------------|--------------------------------------|---------------------|-----------------------------------|
| ≥2 oral antidiabetic drugs  | 2593   | 52,632       | 49.3 (47.4 to 51.2)                  | 1.00 [Reference]    | 1.00 [Reference]                  |
| GLP-1 receptor agonists     | 180    | 4443         | 40.5 (34.8 to 46.9)                  | 0.92 (0.79 to 1.07) | 1.01 (0.86 to 1.17)               |
| <b>≤6 months of use</b>     |        |              |                                      |                     |                                   |
| ≥2 oral antidiabetic drugs  | 810    | 14,988       | 54.0 (50.4 to 57.9)                  | 1.00 [Reference]    | 1.00 [Reference]                  |
| GLP-1 receptor agonists     | 53     | 1410         | 37.6 (28.2 to 49.2)                  | 0.87 (0.66 to 1.15) | 0.94 (0.71 to 1.25)               |
| <b>6.1-12 months of use</b> |        |              |                                      |                     |                                   |
| ≥2 oral antidiabetic drugs  | 419    | 9181         | 45.6 (41.4 to 50.2)                  | 1.00 [Reference]    | 1.00 [Reference]                  |
| GLP-1 receptor agonists     | 48     | 924          | 51.9 (38.3 to 68.9)                  | 1.21 (0.90 to 1.64) | 1.33 (0.99 to 1.80)               |
| <b>&gt;12 months of use</b> |        |              |                                      |                     |                                   |
| ≥2 oral antidiabetic drugs  | 1364   | 28,463       | 47.9 (45.4 to 50.5)                  | 1.00 [Reference]    | 1.00 [Reference]                  |
| GLP-1 receptor agonists     | 79     | 2108         | 37.5 (29.7 to 46.7)                  | 0.85 (0.68 to 1.07) | 0.93 (0.74 to 1.17)               |

*P for heterogeneity = 0.26*

Abbreviations: GLP-1, glucagon-like peptide-1; CI, confidence interval; HR, hazard ratio; BMI, body mass index

<sup>a</sup> Use of other antidiabetic agents is considered in the model, but not presented in the table.

<sup>b</sup> Per 1000 persons per year.

<sup>c</sup> Adjusted for year of cohort entry, age, sex, quintiles of the Index of Multiple Deprivation, alcohol-related disorders, smoking status, BMI category, hemoglobin A1c, systolic and diastolic blood pressure, dyslipidemia, duration of treated diabetes, neuropathy, nephropathy, peripheral arteriopathy, myocardial infarction, ischemic stroke, history of cataract surgery, albuminuria or proteinuria, uveitis, sickle disease, use of statins, fibrates, antihypertensive drugs, ophthalmic agents, antimalarial drugs, fluconazole, tamoxifen, the number of non-antidiabetic drugs, and the number of physician visits.

# SUPPLEMENTARY DATA

**Supplementary Table 8. Crude and adjusted hazard ratios for the association between the use of GLP-1 receptor agonists compared with the use of ≥2 oral antidiabetic drugs and the risk of diabetic retinopathy (additionally adjusting for use of antidiabetic drugs in the year prior to cohort entry)**

| Exposure <sup>a</sup>       | Events | Person-years | Incidence rate <sup>b</sup> (95% CI) | Crude HR (95% CI)   | Adjusted HR (95% CI) <sup>c</sup> |
|-----------------------------|--------|--------------|--------------------------------------|---------------------|-----------------------------------|
| ≥2 oral antidiabetic drugs  | 2386   | 48,692       | 49.0 (47.1 to 51.0)                  | 1.00 [Reference]    | 1.00 [Reference]                  |
| GLP-1 receptor agonists     | 173    | 4281         | 40.4 (34.6 to 46.9)                  | 0.92 (0.78 to 1.07) | 0.98 (0.84 to 1.15)               |
| <b>≤6 months of use</b>     |        |              |                                      |                     |                                   |
| ≥2 oral antidiabetic drugs  | 1203   | 23,473       | 51.3 (48.4 to 54.2)                  | 1.00 [Reference]    | 1.00 [Reference]                  |
| GLP-1 receptor agonists     | 88     | 2305         | 38.2 (30.6 to 47.0)                  | 0.87 (0.70 to 1.08) | 0.93 (0.75 to 1.16)               |
| <b>6.1-12 months of use</b> |        |              |                                      |                     |                                   |
| ≥2 oral antidiabetic drugs  | 394    | 8586         | 45.9 (41.5 to 50.7)                  | 1.00 [Reference]    | 1.00 [Reference]                  |
| GLP-1 receptor agonists     | 47     | 831          | 56.6 (41.6 to 75.2)                  | 1.31 (0.97 to 1.78) | 1.42 (1.05 to 1.93)               |
| <b>&gt;12 months of use</b> |        |              |                                      |                     |                                   |
| ≥2 oral antidiabetic drugs  | 789    | 16,633       | 47.4 (44.2 to 50.9)                  | 1.00 [Reference]    | 1.00 [Reference]                  |
| GLP-1 receptor agonists     | 38     | 1144         | 33.2 (23.5 to 45.6)                  | 0.76 (0.55 to 1.05) | 0.82 (0.59 to 1.14)               |

*P for heterogeneity = 0.07*

Abbreviations: GLP-1, glucagon-like peptide-1; CI, confidence interval; HR, hazard ratio; BMI, body mass index

<sup>a</sup> Use of other antidiabetic agents is considered in the model, but not presented in the table.

<sup>b</sup> Per 1000 persons per year.

<sup>c</sup> Adjusted for year of cohort entry, age, sex, quintiles of the Index of Multiple Deprivation, alcohol-related disorders, smoking status, BMI category, hemoglobin A1c, systolic and diastolic blood pressure, dyslipidemia, duration of treated diabetes, neuropathy, nephropathy, peripheral arteriopathy, myocardial infarction, ischemic stroke, history of cataract surgery, albuminuria or proteinuria, uveitis, sickle disease, use of statins, fibrates, antihypertensive drugs, ophthalmic agents, antimalarial drugs, fluconazole, tamoxifen, the number of non-antidiabetic drugs, and the number of physician visits.

# SUPPLEMENTARY DATA

**Supplementary Table 9. Crude and adjusted hazard ratios for the association between the use of GLP-1 receptor agonists compared with the use of ≥2 oral antidiabetic drugs and the risk of diabetic retinopathy (excluding thiazolidinedione users from the 2 main exposure categories)**

| Exposure <sup>a</sup>       | Events | Person-years | Incidence rate <sup>b</sup> (95% CI) | Crude HR (95% CI)   | Adjusted HR (95% CI) <sup>c</sup> |
|-----------------------------|--------|--------------|--------------------------------------|---------------------|-----------------------------------|
| ≥2 oral antidiabetic drugs  | 1856   | 37,539       | 49.4 (47.2 to 51.7)                  | 1.00 [Reference]    | 1.00 [Reference]                  |
| GLP-1 receptor agonists     | 147    | 3823         | 38.5 (32.5 to 45.2)                  | 0.87 (0.73 to 1.03) | 0.93 (0.79 to 1.11)               |
| <b>≤6 months of use</b>     |        |              |                                      |                     |                                   |
| ≥2 oral antidiabetic drugs  | 1015   | 19,542       | 51.9 (48.8 to 55.2)                  | 1.00 [Reference]    | 1.00 [Reference]                  |
| GLP-1 receptor agonists     | 82     | 2087         | 39.3 (31.2 to 48.8)                  | 0.87 (0.70 to 1.10) | 0.94 (0.75 to 1.18)               |
| <b>6.1-12 months of use</b> |        |              |                                      |                     |                                   |
| ≥2 oral antidiabetic drugs  | 299    | 6680         | 44.8 (39.8 to 50.1)                  | 1.00 [Reference]    | 1.00 [Reference]                  |
| GLP-1 receptor agonists     | 37     | 733          | 50.5 (35.5 to 69.6)                  | 1.20 (0.85 to 1.68) | 1.30 (0.92 to 1.82)               |
| <b>&gt;12 months of use</b> |        |              |                                      |                     |                                   |
| ≥2 oral antidiabetic drugs  | 542    | 11,318       | 47.9 (43.9 to 52.1)                  | 1.00 [Reference]    | 1.00 [Reference]                  |
| GLP-1 receptor agonists     | 28     | 1004         | 27.9 (18.5 to 40.3)                  | 0.63 (0.43 to 0.93) | 0.68 (0.46 to 1.00)               |

*P for heterogeneity = 0.09*

Abbreviations: GLP-1, glucagon-like peptide-1; CI, confidence interval; HR, hazard ratio; BMI, body mass index

<sup>a</sup> Use of other antidiabetic agents is considered in the model, but not presented in the table.

<sup>b</sup> Per 1000 persons per year.

<sup>c</sup> Adjusted for year of cohort entry, age, sex, quintiles of the Index of Multiple Deprivation, alcohol-related disorders, smoking status, BMI category, hemoglobin A1c, systolic and diastolic blood pressure, dyslipidemia, duration of treated diabetes, neuropathy, nephropathy, peripheral arteriopathy, myocardial infarction, ischemic stroke, history of cataract surgery, albuminuria or proteinuria, uveitis, sickle disease, use of statins, fibrates, antihypertensive drugs, ophthalmic agents, antimalarial drugs, fluconazole, tamoxifen, the number of non-antidiabetic drugs, and the number of physician visits.

# SUPPLEMENTARY DATA

**Supplementary Table 10. Crude and adjusted hazard ratios for the association between the use of GLP-1 receptor agonists compared with the use of ≥2 oral antidiabetic drugs and the risk of diabetic retinopathy (multiple imputation for missing values)**

| Exposure <sup>a</sup>       | Events | Person-years | Incidence rate <sup>b</sup> (95% CI) | Crude HR (95% CI)   | Adjusted HR (95% CI) <sup>c</sup> |
|-----------------------------|--------|--------------|--------------------------------------|---------------------|-----------------------------------|
| ≥2 oral antidiabetic drugs  | 2386   | 48,692       | 49.0 (47.1 to 51.0)                  | 1.00 [Reference]    | 1.00 [Reference]                  |
| GLP-1 receptor agonists     | 173    | 4281         | 40.4 (34.6 to 46.9)                  | 0.92 (0.78 to 1.07) | 1.00 (0.85 to 1.17)               |
| <b>≤6 months of use</b>     |        |              |                                      |                     |                                   |
| ≥2 oral antidiabetic drugs  | 1203   | 23,473       | 51.3 (48.4 to 54.2)                  | 1.00 [Reference]    | 1.00 [Reference]                  |
| GLP-1 receptor agonists     | 88     | 2305         | 38.2 (30.6 to 47.0)                  | 0.87 (0.70 to 1.08) | 0.94 (0.76 to 1.17)               |
| <b>6.1-12 months of use</b> |        |              |                                      |                     |                                   |
| ≥2 oral antidiabetic drugs  | 394    | 8586         | 45.9 (41.5 to 50.7)                  | 1.00 [Reference]    | 1.00 [Reference]                  |
| GLP-1 receptor agonists     | 47     | 831          | 56.6 (41.6 to 75.2)                  | 1.31 (0.97 to 1.78) | 1.44 (1.06 to 1.95)               |
| <b>&gt;12 months of use</b> |        |              |                                      |                     |                                   |
| ≥2 oral antidiabetic drugs  | 789    | 16,633       | 47.4 (44.2 to 50.9)                  | 1.00 [Reference]    | 1.00 [Reference]                  |
| GLP-1 receptor agonists     | 38     | 1144         | 33.2 (23.5 to 45.6)                  | 0.76 (0.55 to 1.05) | 0.83 (0.60 to 1.15)               |

*P for heterogeneity = 0.07*

Abbreviations: GLP-1, glucagon-like peptide-1; CI, confidence interval; HR, hazard ratio; BMI, body mass index

<sup>a</sup> Use of other antidiabetic agents is considered in the model, but not presented in the table.

<sup>b</sup> Per 1000 persons per year.

<sup>c</sup> Adjusted for year of cohort entry, age, sex, quintiles of the Index of Multiple Deprivation, alcohol-related disorders, smoking status, BMI category, hemoglobin A1c, systolic and diastolic blood pressure, dyslipidemia, duration of treated diabetes, neuropathy, nephropathy, peripheral arteriopathy, myocardial infarction, ischemic stroke, history of cataract surgery, albuminuria or proteinuria, uveitis, sickle disease, use of statins, fibrates, antihypertensive drugs, ophthalmic agents, antimalarial drugs, fluconazole, tamoxifen, the number of non-antidiabetic drugs, and the number of physician visits.

# SUPPLEMENTARY DATA

**Supplementary Table 11. Crude and adjusted hazard ratios for the association between the use of GLP-1 receptor agonists compared with the use of ≥2 oral antidiabetic drugs and the risk of diabetic retinopathy (competing risk analysis)**

| Exposure <sup>a</sup>       | Events | Person-years | Incidence rate <sup>b</sup> (95% CI) | Crude HR (95% CI)   | Adjusted HR (95% CI) <sup>c</sup> |
|-----------------------------|--------|--------------|--------------------------------------|---------------------|-----------------------------------|
| ≥2 oral antidiabetic drugs  | 2386   | 48,692       | 49.0 (47.1 to 51.0)                  | 1.00 [Reference]    | 1.00 [Reference]                  |
| GLP-1 receptor agonists     | 173    | 4281         | 40.4 (34.6 to 46.9)                  | 0.92 (0.78 to 1.07) | 1.00 (0.85 to 1.17)               |
| <b>≤6 months of use</b>     |        |              |                                      |                     |                                   |
| ≥2 oral antidiabetic drugs  | 1203   | 23,473       | 51.3 (48.4 to 54.2)                  | 1.00 [Reference]    | 1.00 [Reference]                  |
| GLP-1 receptor agonists     | 88     | 2305         | 38.2 (30.6 to 47.0)                  | 0.88 (0.70 to 1.09) | 0.95 (0.76 to 1.18)               |
| <b>6.1-12 months of use</b> |        |              |                                      |                     |                                   |
| ≥2 oral antidiabetic drugs  | 394    | 8586         | 45.9 (41.5 to 50.7)                  | 1.00 [Reference]    | 1.00 [Reference]                  |
| GLP-1 receptor agonists     | 47     | 831          | 56.6 (41.6 to 75.2)                  | 1.32 (0.97 to 1.79) | 1.44 (1.06 to 1.96)               |
| <b>&gt;12 months of use</b> |        |              |                                      |                     |                                   |
| ≥2 oral antidiabetic drugs  | 789    | 16,633       | 47.4 (44.2 to 50.9)                  | 1.00 [Reference]    | 1.00 [Reference]                  |
| GLP-1 receptor agonists     | 38     | 1144         | 33.2 (23.5 to 45.6)                  | 0.76 (0.55 to 1.06) | 0.83 (0.60 to 1.16)               |

*P for heterogeneity = 0.08*

Abbreviations: GLP-1, glucagon-like peptide-1; CI, confidence interval; HR, hazard ratio; BMI, body mass index

<sup>a</sup> Use of other antidiabetic agents is considered in the model, but not presented in the table.

<sup>b</sup> Per 1000 persons per year

<sup>c</sup> Adjusted for year of cohort entry, age, sex, quintiles of the Index of Multiple Deprivation, alcohol-related disorders, smoking status, BMI category, hemoglobin A1c, systolic and diastolic blood pressure, dyslipidemia, duration of treated diabetes, neuropathy, nephropathy, peripheral arteriopathy, myocardial infarction, ischemic stroke, history of cataract surgery, albuminuria or proteinuria, uveitis, sickle disease, use of statins, fibrates, antihypertensive drugs, ophthalmic agents, antimalarial drugs, fluconazole, tamoxifen, the number of non-antidiabetic drugs, and the number of physician visits.

# SUPPLEMENTARY DATA

**Supplementary Table 12. Crude and adjusted hazard ratios for the association between the use of GLP-1 receptor agonists compared with the use of ≥2 oral antidiabetic drugs and the risk of diabetic retinopathy (stratification on high-dimensional disease risk score deciles)**

| Exposure <sup>a</sup>       | Events | Person-years | Incidence rate <sup>b</sup> (95% CI) | Crude HR (95% CI)   | Adjusted HR (95% CI) <sup>c</sup> |
|-----------------------------|--------|--------------|--------------------------------------|---------------------|-----------------------------------|
| ≥2 oral antidiabetic drugs  | 2386   | 48,692       | 49.0 (47.1 to 51.0)                  | 1.00 [Reference]    | 1.00 [Reference]                  |
| GLP-1 receptor agonists     | 173    | 4281         | 40.4 (34.6 to 46.9)                  | 0.92 (0.78 to 1.07) | 1.05 (0.90 to 1.23)               |
| <b>≤6 months of use</b>     |        |              |                                      |                     |                                   |
| ≥2 oral antidiabetic drugs  | 1203   | 23,473       | 51.3 (48.4 to 54.2)                  | 1.00 [Reference]    | 1.00 [Reference]                  |
| GLP-1 receptor agonists     | 88     | 2305         | 38.2 (30.6 to 47.0)                  | 0.87 (0.70 to 1.08) | 0.96 (0.77 to 1.19)               |
| <b>6.1-12 months of use</b> |        |              |                                      |                     |                                   |
| ≥2 oral antidiabetic drugs  | 394    | 8586         | 45.9 (41.5 to 50.7)                  | 1.00 [Reference]    | 1.00 [Reference]                  |
| GLP-1 receptor agonists     | 47     | 831          | 56.6 (41.6 to 75.2)                  | 1.31 (0.97 to 1.78) | 1.52 (1.12 to 2.06)               |
| <b>&gt;12 months of use</b> |        |              |                                      |                     |                                   |
| ≥2 oral antidiabetic drugs  | 789    | 16,633       | 47.4 (44.2 to 50.9)                  | 1.00 [Reference]    | 1.00 [Reference]                  |
| GLP-1 receptor agonists     | 38     | 1144         | 33.2 (23.5 to 45.6)                  | 0.76 (0.55 to 1.05) | 0.95 (0.68 to 1.31)               |

*P for heterogeneity = 0.09*

Abbreviations: GLP-1, glucagon-like peptide-1; CI, confidence interval; HR, hazard ratio

<sup>a</sup> Use of other antidiabetic agents is considered in the model, but not presented in the table.

<sup>b</sup> Per 1000 persons per year.

<sup>c</sup> Stratified by high-dimensional disease risk score deciles.

# SUPPLEMENTARY DATA

**Supplementary Table 13. Crude and adjusted hazard ratios for the association between the use of GLP-1 receptor agonists compared with the use of ≥2 oral antidiabetic drugs and the risk of diabetic retinopathy in patients without screening for diabetic retinopathy in the year prior to cohort entry**

| Exposure <sup>a</sup>       | Events | Person-years | Incidence rate <sup>b</sup> (95% CI) | Crude HR (95% CI)   | Adjusted HR (95% CI) <sup>c</sup> |
|-----------------------------|--------|--------------|--------------------------------------|---------------------|-----------------------------------|
| ≥2 oral antidiabetic drugs  | 1523   | 30,249       | 50.3 (47.9 to 52.9)                  | 1.00 [Reference]    | 1.00 [Reference]                  |
| GLP-1 receptor agonists     | 95     | 2485         | 38.2 (30.9 to 46.7)                  | 0.84 (0.52 to 1.34) | 0.93 (0.75 to 1.15)               |
| <b>≤6 months of use</b>     |        |              |                                      |                     |                                   |
| ≥2 oral antidiabetic drugs  | 807    | 14,869       | 54.3 (50.6 to 58.2)                  | 1.00 [Reference]    | 1.00 [Reference]                  |
| GLP-1 receptor agonists     | 50     | 1349         | 37.1 (27.5 to 48.9)                  | 0.85 (0.64 to 1.13) | 0.93 (0.70 to 1.24)               |
| <b>6.1-12 months of use</b> |        |              |                                      |                     |                                   |
| ≥2 oral antidiabetic drugs  | 236    | 5258         | 44.9 (39.3 to 41.0)                  | 1.00 [Reference]    | 1.00 [Reference]                  |
| GLP-1 receptor agonists     | 24     | 477          | 50.3 (32.2 to 74.9)                  | 1.21 (0.80 to 1.84) | 1.34 (0.88 to 2.05)               |
| <b>&gt;12 months of use</b> |        |              |                                      |                     |                                   |
| ≥2 oral antidiabetic drugs  | 453    | 9412         | 48.1 (43.8 to 52.8)                  | 1.00 [Reference]    | 1.00 [Reference]                  |
| GLP-1 receptor agonists     | 16     | 607          | 26.4 (15.1 to 42.8)                  | 0.61 (0.37 to 1.00) | 0.67 (0.41 to 1.10)               |

*P for heterogeneity = 0.20*

Abbreviations: GLP-1, glucagon-like peptide-1; CI, confidence interval; HR, hazard ratio; BMI, body mass index

<sup>a</sup> Use of other antidiabetic agents is considered in the model, but not presented in the table.

<sup>b</sup> Per 1000 persons per year.

<sup>c</sup> Adjusted for year of cohort entry, age, sex, quintiles of the Index of Multiple Deprivation, alcohol-related disorders, smoking status, BMI category, hemoglobin A1c, systolic and diastolic blood pressure, dyslipidemia, duration of treated diabetes, neuropathy, nephropathy, peripheral arteriopathy, myocardial infarction, ischemic stroke, history of cataract surgery, albuminuria or proteinuria, uveitis, sickle disease, use of statins, fibrates, antihypertensive drugs, ophthalmic agents, antimalarial drugs, fluconazole, tamoxifen, the number of non-antidiabetic drugs, and the number of physician visits.

# SUPPLEMENTARY DATA

**Supplementary Table 14. Crude and adjusted hazard ratios for the association between the use of GLP-1 receptor agonists compared with the use of ≥2 oral antidiabetic drugs and the risk of diabetic retinopathy in patients with screening for diabetic retinopathy in the year prior to cohort entry**

| Exposure <sup>a</sup>       | Events | Person-years | Incidence rate <sup>b</sup> (95% CI) | Crude HR (95% CI)   | Adjusted HR (95% CI) <sup>c</sup> |
|-----------------------------|--------|--------------|--------------------------------------|---------------------|-----------------------------------|
| ≥2 oral antidiabetic drugs  | 863    | 18,443       | 46.8 (43.7 to 50.0)                  | 1.00 [Reference]    | 1.00 [Reference]                  |
| GLP-1 receptor agonists     | 78     | 1796         | 43.4 (34.3 to 54.2)                  | 0.97 (0.77 to 1.22) | 1.08 (0.86 to 1.36)               |
| <b>≤6 months of use</b>     |        |              |                                      |                     |                                   |
| ≥2 oral antidiabetic drugs  | 396    | 8604         | 46.0 (41.6 to 50.8)                  | 1.00 [Reference]    | 1.00 [Reference]                  |
| GLP-1 receptor agonists     | 38     | 956          | 39.7 (28.1 to 54.6)                  | 0.90 (0.65 to 1.26) | 0.95 (0.68 to 1.33)               |
| <b>6.1-12 months of use</b> |        |              |                                      |                     |                                   |
| ≥2 oral antidiabetic drugs  | 158    | 3328         | 47.5 (40.4 to 55.5)                  | 1.00 [Reference]    | 1.00 [Reference]                  |
| GLP-1 receptor agonists     | 23     | 355          | 64.8 (41.1 to 97.2)                  | 1.44 (0.93 to 2.23) | 1.55 (1.00 to 2.41)               |
| <b>&gt;12 months of use</b> |        |              |                                      |                     |                                   |
| ≥2 oral antidiabetic drugs  | 336    | 7220         | 46.5 (41.7 to 51.8)                  | 1.00 [Reference]    | 1.00 [Reference]                  |
| GLP-1 receptor agonists     | 22     | 537          | 41.0 (25.7 to 62.0)                  | 0.93 (0.60 to 1.43) | 1.04 (0.67 to 1.60)               |
|                             |        |              |                                      |                     | <i>P for heterogeneity = 0.27</i> |

Abbreviations: GLP-1, glucagon-like peptide-1; CI, confidence interval; HR, hazard ratio; BMI, body mass index

<sup>a</sup> Use of other antidiabetic agents is considered in the model, but not presented in the table.

<sup>b</sup> Per 1000 persons per year.

<sup>c</sup> Adjusted for year of cohort entry, age, sex, quintiles of the Index of Multiple Deprivation, alcohol-related disorders, smoking status, BMI category, hemoglobin A1c, systolic and diastolic blood pressure, dyslipidemia, duration of treated diabetes, neuropathy, nephropathy, peripheral arteriopathy, myocardial infarction, ischemic stroke, history of cataract surgery, albuminuria or proteinuria, uveitis, sickle disease, use of statins, fibrates, antihypertensive drugs, ophthalmic agents, antimalarial drugs, fluconazole, tamoxifen, the number of non-antidiabetic drugs, and the number of physician visits.



## SUPPLEMENTARY DATA

**Supplementary Table 15. Bounds on corrected estimates and 95% confidence intervals for unmeasured confounding (sensitivity analysis without assumptions)\***

|            | <b>1.2</b>       | <b>1.3</b>       | <b>1.5</b>       | <b>1.8</b>       | <b>2</b>         | <b>2.5</b>       | <b>3</b>         | <b>4</b>         | <b>5</b>         | <b>6</b>         | <b>8</b>         | <b>10</b>        |
|------------|------------------|------------------|------------------|------------------|------------------|------------------|------------------|------------------|------------------|------------------|------------------|------------------|
| <b>1.2</b> | 1.41 (1.06-1.89) | 1.39 (1.05-1.87) | 1.37 (1.03-1.83) | 1.34 (1.01-1.80) | 1.33 (1.00-1.78) | 1.31 (0.98-1.75) | 1.29 (0.97-1.72) | 1.27 (0.95-1.7)  | 1.26 (0.94-1.68) | 1.25 (0.94-1.67) | 1.24 (0.93-1.66) | 1.23 (0.93-1.65) |
| <b>1.3</b> | 1.39 (1.05-1.87) | 1.37 (1.03-1.84) | 1.34 (1.01-1.79) | 1.30 (0.98-1.74) | 1.28 (0.96-1.72) | 1.25 (0.94-1.67) | 1.23 (0.92-1.64) | 1.20 (0.90-1.60) | 1.18 (0.89-1.58) | 1.17 (0.88-1.57) | 1.16 (0.87-1.55) | 1.15 (0.86-1.54) |
| <b>1.5</b> | 1.37 (1.03-1.83) | 1.34 (1.01-1.79) | 1.29 (0.97-1.72) | 1.24 (0.93-1.65) | 1.21 (0.91-1.62) | 1.16 (0.87-1.55) | 1.13 (0.85-1.51) | 1.09 (0.82-1.46) | 1.06 (0.80-1.42) | 1.05 (0.79-1.40) | 1.03 (0.77-1.37) | 1.02 (0.76-1.36) |
| <b>1.8</b> | 1.34 (1.01-1.80) | 1.30 (0.98-1.74) | 1.24 (0.93-1.65) | 1.16 (0.87-1.56) | 1.13 (0.85-1.51) | 1.06 (0.80-1.42) | 1.02 (0.77-1.37) | 0.97 (0.73-1.29) | 0.93 (0.70-1.25) | 0.91 (0.69-1.22) | 0.89 (0.67-1.19) | 0.87 (0.65-1.16) |
| <b>2</b>   | 1.33 (1.00-1.78) | 1.28 (0.96-1.72) | 1.21 (0.91-1.62) | 1.13 (0.85-1.51) | 1.09 (0.82-1.46) | 1.02 (0.76-1.36) | 0.97 (0.73-1.29) | 0.91 (0.68-1.21) | 0.87 (0.65-1.16) | 0.85 (0.64-1.13) | 0.82 (0.61-1.09) | 0.80 (0.60-1.07) |
| <b>2.5</b> | 1.31 (0.98-1.75) | 1.25 (0.94-1.67) | 1.16 (0.87-1.55) | 1.06 (0.80-1.42) | 1.02 (0.76-1.36) | 0.93 (0.7-1.24)  | 0.87 (0.65-1.16) | 0.80 (0.60-1.07) | 0.75 (0.57-1.01) | 0.73 (0.55-0.97) | 0.69 (0.52-0.92) | 0.67 (0.50-0.89) |
| <b>3</b>   | 1.29 (0.97-1.72) | 1.23 (0.92-1.64) | 1.13 (0.85-1.51) | 1.02 (0.77-1.37) | 0.97 (0.73-1.29) | 0.87 (0.65-1.16) | 0.81 (0.61-1.08) | 0.73 (0.55-0.97) | 0.68 (0.51-0.91) | 0.64 (0.48-0.86) | 0.60 (0.45-0.81) | 0.58 (0.44-0.78) |
| <b>4</b>   | 1.27 (0.95-1.70) | 1.20 (0.90-1.60) | 1.09 (0.82-1.46) | 0.97 (0.73-1.29) | 0.91 (0.68-1.21) | 0.80 (0.60-1.07) | 0.73 (0.55-0.97) | 0.63 (0.48-0.85) | 0.58 (0.44-0.78) | 0.54 (0.41-0.73) | 0.50 (0.37-0.67) | 0.47 (0.35-0.63) |
| <b>5</b>   | 1.26 (0.94-1.68) | 1.18 (0.89-1.58) | 1.06 (0.80-1.42) | 0.93 (0.70-1.25) | 0.87 (0.65-1.16) | 0.75 (0.57-1.01) | 0.68 (0.51-0.91) | 0.58 (0.44-0.78) | 0.52 (0.39-0.70) | 0.48 (0.36-0.65) | 0.44 (0.33-0.58) | 0.41 (0.31-0.54) |
| <b>6</b>   | 1.25 (0.94-1.67) | 1.17 (0.88-1.57) | 1.05 (0.79-1.40) | 0.91 (0.69-1.22) | 0.85 (0.64-1.13) | 0.73 (0.55-0.97) | 0.64 (0.48-0.86) | 0.54 (0.41-0.73) | 0.48 (0.36-0.65) | 0.44 (0.33-0.59) | 0.39 (0.30-0.53) | 0.36 (0.27-0.49) |
| <b>8</b>   | 1.24 (0.93-1.66) | 1.16 (0.87-1.55) | 1.03 (0.77-1.37) | 0.89 (0.67-1.19) | 0.82 (0.61-1.09) | 0.69 (0.52-0.92) | 0.60 (0.45-0.81) | 0.50 (0.37-0.67) | 0.44 (0.33-0.58) | 0.39 (0.30-0.53) | 0.34 (0.26-0.45) | 0.31 (0.23-0.41) |
| <b>10</b>  | 1.23 (0.93-1.65) | 1.15 (0.86-1.54) | 1.02 (0.76-1.36) | 0.87 (0.65-1.16) | 0.80 (0.60-1.07) | 0.67 (0.50-0.89) | 0.58 (0.44-0.78) | 0.47 (0.35-0.63) | 0.41 (0.31-0.54) | 0.36 (0.27-0.49) | 0.31 (0.23-0.41) | 0.28 (0.21-0.37) |

\* Rows correspond to increasing strength of the risk ratio of unmeasured confounding on the outcome and columns correspond to increasing strength of risk ratio of unmeasured confounding on the exposure.

# SUPPLEMENTARY DATA

**Supplementary Table 16. Baseline demographics and clinical characteristics of the cohort and stratified by used of DPP-4 inhibitors and insulin at cohort entry**

| Characteristic                                   | Entire Cohort | Use at Cohort Entry |             |
|--------------------------------------------------|---------------|---------------------|-------------|
|                                                  |               | DPP-4 inhibitors    | Insulins    |
| Total                                            | 77,115        | 2605                | 1544        |
| Age, years (mean, SD)                            | 61.6 (13.6)   | 65.3 (11.6)         | 64.7 (13.0) |
| Male, n (%)                                      | 44,155 (57.3) | 1484 (57.0)         | 866 (56.1)  |
| Index of Multiple Deprivation, n (%)             |               |                     |             |
| Quintile 1                                       | 14,799 (19.2) | §                   | 307 (19.9)  |
| Quintile 2                                       | 15,947 (20.7) | 585 (22.5)          | 286 (18.5)  |
| Quintile 3                                       | 15,993 (20.7) | 521 (20.0)          | 321 (20.8)  |
| Quintile 4                                       | 15,732 (20.4) | 501 (19.2)          | 331 (21.4)  |
| Quintile 5                                       | 14,595 (18.9) | 521 (20.0)          | 299 (19.4)  |
| Unknown                                          | 49 (0.1)      | §                   | 0 (0.0)     |
| Alcohol-related disorders, n (%)                 | 10,671 (13.8) | 506 (19.4)          | 286 (18.5)  |
| Smoking status, n (%)                            |               |                     |             |
| Current                                          | 12,434 (16.1) | 360 (13.8)          | §           |
| Past                                             | 28,540 (37.0) | 1054 (40.5)         | 667 (43.2)  |
| Never                                            | 35,864 (46.5) | 1191 (45.7)         | 643 (41.7)  |
| Unknown                                          | 277 (0.4)     | 0 (0.0)             | §           |
| Body mass index, n (%)                           |               |                     |             |
| <25 kg/m <sup>2</sup>                            | 8484 (11.0)   | 251 (9.6)           | 252 (16.3)  |
| 25-30 kg/m <sup>2</sup>                          | 22,938 (29.8) | 754 (28.9)          | 467 (30.3)  |
| ≥30 kg/m <sup>2</sup>                            | 43,730 (56.7) | 1590 (61.0)         | 816 (52.9)  |
| Unknown                                          | 1963 (2.5)    | 10 (0.4)            | 9 (0.6)     |
| Hemoglobin A1c, n (%)                            |               |                     |             |
| ≤7.0% or ≤53 mmol/mol,                           | 13,453 (17.4) | 420 (16.1)          | 140 (9.1)   |
| 7.1%-8.0% or 54-64 mmol/mol                      | 16,658 (21.6) | 861 (33.1)          | 193 (12.5)  |
| >8.0% or >64 mmol/mol                            | 24,031 (31.2) | 1211 (46.5)         | 1205 (78.0) |
| Unknown                                          | 22,973 (29.8) | 113 (4.3)           | 6 (0.4)     |
| Blood pressure, n (%)                            |               |                     |             |
| Systolic <140 mm Hg and diastolic <90 mm Hg      | 39,307 (51.0) | 1548 (59.4)         | 919 (59.5)  |
| Systolic ≥140 mm Hg or diastolic ≥90 mm Hg       | 32,196 (41.7) | 979 (37.6)          | 573 (37.1)  |
| Unknown                                          | 5612 (7.3)    | 78 (3.0)            | 52 (3.4)    |
| Dyslipidemia, n (%)                              | 17,931 (23.3) | 833 (32.0)          | 468 (30.3)  |
| Duration of treated diabetes in years (mean, SD) | 1.0 (2.4)     | 6.7 (3.5)           | 6.0 (2.9)   |
| Neuropathy, n (%)                                | 7364 (9.5)    | 679 (26.1)          | 385 (24.9)  |
| Nephropathy, n (%)                               | 25,476 (33.0) | 1250 (48.0)         | 770 (49.0)  |
| Peripheral arteriopathy, n (%)                   | 3056 (4.0)    | 164 (6.3)           | 143 (9.3)   |
| Myocardial infarction, n (%)                     | 5774 (7.5)    | 239 (9.2)           | 242 (15.7)  |
| Ischemic stroke, n (%)                           | 3778 (4.9)    | 150 (5.8)           | 124 (8.0)   |
| Cataract surgery, n (%)                          | 5800 (7.5)    | 281 (10.8)          | 159 (10.3)  |
| Albuminuria or proteinuria, n (%)                | 6339 (8.2)    | 520 (20.0)          | 396 (25.7)  |
| Uveitis, n (%)                                   | 302 (0.4)     | 17 (0.7)            | 10 (0.7)    |
| Sickle-cell disease, n (%)                       | 123 (0.2)     | 6 (0.2)             | §           |
| Statins, n (%)                                   | 47,765 (61.9) | 2161 (83.0)         | 1245 (80.6) |
| Fibrates, n (%)                                  | 1231 (1.6)    | 82 (3.2)            | 46 (3.0)    |
| Antihypertensive drugs, n (%)                    |               |                     |             |
| Calcium channel blockers                         | 20,705 (26.8) | 840 (32.3)          | 513 (33.2)  |
| Angiotensin-converting enzyme inhibitors         | 29,310 (38.0) | 1371 (52.6)         | 829 (54.0)  |
| Angiotensin receptor blockers                    | 10,161 (13.2) | 547 (21.0)          | 282 (18.3)  |
| Beta-blockers                                    | 17,524 (22.7) | 722 (27.7)          | 501 (32.5)  |

# SUPPLEMENTARY DATA

| Characteristic                              | Entire Cohort | Use at Cohort Entry |             |
|---------------------------------------------|---------------|---------------------|-------------|
|                                             |               | DPP-4 inhibitors    | Insulins    |
| Diuretics                                   | 22,781 (29.5) | 936 (35.9)          | 647 (41.9)  |
| Mineralocorticoid receptor antagonists      | 1671 (2.2)    | 73 (2.8)            | 101 (6.5)   |
| Other antihypertensive drugs                | 742 (1.0)     | 38 (1.5)            | 27 (1.8)    |
| Ophthalmic agents                           | 1758 (2.3)    | 75 (2.9)            | 50 (3.2)    |
| Antimalarial drugs                          | 258 (0.3)     | 8 (0.3)             | 5 (0.3)     |
| Fluconazole                                 | 1897 (2.5)    | 60 (2.3)            | 53 (3.4)    |
| Tamoxifen                                   | 306 (0.4)     | 9 (0.4)             | 10 (0.7)    |
| Number of non-antidiabetic drugs (mean, SD) | 8.0 (6.1)     | 10.2 (6.2)          | 12.2 (6.6)  |
| 0                                           | 3775 (4.9)    | 24 (0.9)            | 6 (0.4)     |
| 1                                           | 4327 (5.6)    | 36 (1.4)            | 5 (0.3)     |
| 2                                           | 5106 (6.6)    | 54 (2.1)            | 19 (1.2)    |
| 3                                           | 5605 (7.3)    | 102 (3.9)           | 41 (2.7)    |
| ≥4                                          | 58,302 (75.6) | 2389 (91.7)         | 1473 (95.4) |
| Number of physician visits, mean (SD)       | 7.6 (9.1)     | 9.3 (10.4)          | 11.7 (12.2) |

Abbreviations: SD, standard deviation; DPP-4, dipeptidyl peptidase-4

<sup>a</sup> Patients exposed to other antidiabetic drugs at cohort entry (n=72,976) are not displayed in the table.

§ Numbers <5 are not displayed, as per the confidentiality policies of the Clinical Practice Research Datalink

# SUPPLEMENTARY DATA

**Supplementary Table 17. Crude and adjusted hazard ratios for the association between the use of DPP-4 inhibitors compared with the use of ≥2 oral antidiabetic drugs and the risk of diabetic retinopathy**

| Exposure <sup>a</sup>       | Events | Person-years | Incidence rate <sup>b</sup> (95% CI) | Crude HR (95% CI)   | Adjusted HR (95% CI) <sup>c</sup> |
|-----------------------------|--------|--------------|--------------------------------------|---------------------|-----------------------------------|
| ≥2 oral antidiabetic drugs  | 2386   | 48,692       | 49.0 (47.1 to 51.0)                  | 1.00 [Reference]    | 1.00 [Reference]                  |
| DPP-4 inhibitors            | 853    | 20,037       | 42.6 (39.8 to 45.5)                  | 0.94 (0.87 to 1.02) | 1.03 (0.95 to 1.11)               |
| <b>≤6 months of use</b>     |        |              |                                      |                     |                                   |
| ≥2 oral antidiabetic drugs  | 1203   | 23,473       | 51.3 (48.4 to 54.2)                  | 1.00 [Reference]    | 1.00 [Reference]                  |
| DPP-4 inhibitors            | 351    | 7719         | 45.5 (40.8 to 50.5)                  | 0.96 (0.85 to 1.08) | 1.04 (0.92 to 1.17)               |
| <b>6.1-12 months of use</b> |        |              |                                      |                     |                                   |
| ≥2 oral antidiabetic drugs  | 394    | 8586         | 45.9 (41.5 to 50.7)                  | 1.00 [Reference]    | 1.00 [Reference]                  |
| DPP-4 inhibitors            | 181    | 4071         | 44.5 (38.2 to 51.4)                  | 1.01 (0.85 to 1.21) | 1.10 (0.92 to 1.31)               |
| <b>&gt;12 months of use</b> |        |              |                                      |                     |                                   |
| ≥2 oral antidiabetic drugs  | 789    | 16,633       | 47.4 (44.2 to 50.9)                  | 1.00 [Reference]    | 1.00 [Reference]                  |
| DPP-4 inhibitors            | 321    | 8247         | 38.9 (34.8 to 43.4)                  | 0.87 (0.76 to 0.99) | 0.95 (0.84 to 1.09)               |

*P for heterogeneity = 0.56*

Abbreviations: DPP-4, dipeptidyl peptidase-4; CI, confidence interval; HR, hazard ratio; BMI, body mass index

<sup>a</sup> Use of other antidiabetic agents is considered in the model, but not presented in the table.

<sup>b</sup> Per 1000 persons per year.

<sup>c</sup> Adjusted for year of cohort entry, age, sex, quintiles of the Index of Multiple Deprivation, alcohol-related disorders, smoking status, BMI category, hemoglobin A1c, systolic and diastolic blood pressure, dyslipidemia, duration of treated diabetes, neuropathy, nephropathy, peripheral arteriopathy, myocardial infarction, ischemic stroke, history of cataract surgery, albuminuria or proteinuria, uveitis, sickle disease, use of statins, fibrates, antihypertensive drugs, ophthalmic agents, antimalarial drugs, fluconazole, tamoxifen, the number of non-antidiabetic drugs, and the number of physician visits

# SUPPLEMENTARY DATA

**Supplementary Table 18. Crude and adjusted hazard ratios for the association between the use of insulin compared with the use of ≥2 oral antidiabetic drugs and the risk of diabetic retinopathy**

| Exposure <sup>a</sup>       | Events | Person-years | Incidence rate <sup>b</sup> (95% CI) | Crude HR (95% CI)   | Adjusted HR (95% CI) <sup>c</sup> |
|-----------------------------|--------|--------------|--------------------------------------|---------------------|-----------------------------------|
| ≥2 oral antidiabetic drugs  | 2386   | 48,692       | 49.0 (47.1 to 51.0)                  | 1.00 [Reference]    | 1.00 [Reference]                  |
| Insulin                     | 659    | 12,282       | 53.7 (49.6 to 57.9)                  | 1.17 (1.08 to 1.28) | 1.17 (1.07 to 1.28)               |
| <b>≤6 months of use</b>     |        |              |                                      |                     |                                   |
| ≥2 oral antidiabetic drugs  | 1203   | 23,473       | 51.3 (48.4 to 54.2)                  | 1.00 [Reference]    | 1.00 [Reference]                  |
| Insulin                     | 374    | 7184         | 52.1 (46.9 to 57.6)                  | 1.14 (1.01 to 1.28) | 1.14 (1.01 to 1.28)               |
| <b>6.1-12 months of use</b> |        |              |                                      |                     |                                   |
| ≥2 oral antidiabetic drugs  | 394    | 8586         | 45.9 (41.5 to 50.7)                  | 1.00 [Reference]    | 1.00 [Reference]                  |
| Insulin                     | 107    | 1947         | 55.0 (45.0 to 66.4)                  | 1.25 (1.01 to 1.55) | 1.25 (1.01 to 1.55)               |
| <b>&gt;12 months of use</b> |        |              |                                      |                     |                                   |
| ≥2 oral antidiabetic drugs  | 789    | 16,633       | 47.4 (44.2 to 50.9)                  | 1.00 [Reference]    | 1.00 [Reference]                  |
| Insulin                     | 178    | 3151         | 56.5 (48.5 to 65.4)                  | 1.27 (1.08 to 1.49) | 1.26 (1.07 to 1.48)               |

*P for heterogeneity = 0.001*

Abbreviations: CI, confidence interval; HR, hazard ratio; BMI, body mass index

<sup>a</sup> Use of other antidiabetic agents is considered in the model, but not presented in the table

<sup>b</sup> Per 1000 persons per year

<sup>c</sup> Adjusted for year of cohort entry, age, sex, quintiles of the Index of Multiple Deprivation, alcohol-related disorders, smoking status, BMI category, hemoglobin A1c, systolic and diastolic blood pressure, dyslipidemia, duration of treated diabetes, neuropathy, nephropathy, peripheral arteriopathy, myocardial infarction, ischemic stroke, history of cataract surgery, albuminuria or proteinuria, uveitis, sickle disease, use of statins, fibrates, antihypertensive drugs, ophthalmic agents, antimalarial drugs, fluconazole, tamoxifen, the number of non-antidiabetic drugs, and the number of physician visits

SUPPLEMENTARY DATA

**Supplementary Table 19. Baseline demographics and clinical characteristics of new users of GLP-1 receptor agonists and new users of insulin**

| Characteristic                                 | GLP-1 receptor agonists | Insulin     |
|------------------------------------------------|-------------------------|-------------|
| Total                                          | 2606                    | 5556        |
| Age, years (mean, SD)                          | 55.9 (10.4)             | 61.0 (14.4) |
| Male, n (%)                                    | 1419 (54.5)             | 3078 (55.4) |
| Index of Multiple Deprivation, n (%)           |                         |             |
| Quintile 1                                     | 428 (16.4)              | 1022 (18.4) |
| Quintile 2                                     | 497 (19.1)              | 1074 (19.3) |
| Quintile 3                                     | 549 (21.1)              | 1133 (20.4) |
| Quintile 4                                     | 564 (21.6)              | 1192 (21.5) |
| Quintile 5                                     | 568 (21.8)              | 1135 (20.4) |
| unknown                                        | 0 (0.0)                 | 0 (0.0)     |
| Alcohol-related disorders, n (%)               | 480 (18.4)              | 1084 (19.5) |
| Smoking status, n (%)                          |                         |             |
| Current                                        | 388 (14.9)              | 1013 (18.2) |
| Past                                           | 1121 (43.0)             | 2183 (39.3) |
| Never                                          | 1097 (42.1)             | 2360 (42.5) |
| Unknown                                        | 0 (0.0)                 | 0 (0.0)     |
| Body mass index, n (%)                         |                         |             |
| <25 kg/m <sup>2</sup>                          | 15 (0.6)                | 1111 (20.0) |
| 25-30 kg/m <sup>2</sup>                        | 152 (5.8)               | 1752 (31.5) |
| ≥30.0 kg/m <sup>2</sup>                        | 2434 (93.4)             | 2616 (47.1) |
| Unknown                                        | 5 (0.2)                 | 77 (1.4)    |
| Hemoglobin A1c, n (%)                          |                         |             |
| ≤7.0%                                          | 324 (12.4)              | 611 (11.0)  |
| 7.1%-8.0%                                      | 536 (20.6)              | 748 (13.5)  |
| >8.0%                                          | 1619 (62.1)             | 3653 (65.8) |
| Unknown                                        | 127 (4.9)               | 544 (9.8)   |
| Blood pressure, n (%)                          |                         |             |
| Systolic <140 mm Hg and diastolic <90 mm Hg    | 1553 (59.6)             | 3544 (63.8) |
| Systolic ≥140 mm Hg or diastolic ≥90 mm Hg     | 989 (38.0)              | 1770 (31.9) |
| Unknown                                        | 64 (2.5)                | 242 (4.4)   |
| Dyslipidemia, n (%)                            | 682 (26.2)              | 1448 (26.1) |
| Duration of treated diabetes in years (median) | 4.6                     | 3.9         |
| Neuropathy, n (%)                              | 533 (20.5)              | 1047 (18.8) |
| Nephropathy, n (%)                             | 684 (26.3)              | 2408 (43.3) |
| Peripheral arteriopathy, n (%)                 | 85 (3.3)                | 370 (6.7)   |
| Myocardial infarction, n (%)                   | 151 (5.8)               | 650 (11.7)  |
| Ischemic stroke, n (%)                         | 88 (3.4)                | 354 (6.4)   |
| Cataract surgery, n (%)                        | 94 (3.6)                | 467 (8.4)   |
| Albuminuria or proteinuria, n (%)              | 461 (17.7)              | 991 (17.8)  |
| Uveitis, n (%)                                 | 12 (0.5)                | 25 (0.5)    |
| Sickle-cell disease, n (%)                     | §                       | 9 (0.2)     |
| Statins, n (%)                                 | 2100 (80.6)             | 3925 (70.6) |
| Fibrates, n (%)                                | 91 (3.5)                | 176 (3.2)   |
| Antihypertensive drugs, n (%)                  |                         |             |
| Calcium channel blockers                       | 753 (28.9)              | 1492 (26.9) |

# SUPPLEMENTARY DATA

| Characteristic                              | GLP-1 receptor agonists | Insulin     |
|---------------------------------------------|-------------------------|-------------|
| Angiotensin-converting enzyme inhibitors    | 1298 (49.8)             | 2445 (44.0) |
| Angiotensin receptor blockers               | 516 (19.8)              | 872 (15.7)  |
| Beta-blockers                               | 549 (21.1)              | 1540 (27.7) |
| Diuretics                                   | 820 (31.5)              | 1856 (33.4) |
| Mineralocorticoid receptor antagonists      | 54 (2.1)                | 307 (5.5)   |
| Other antihypertensive drugs                | 51 (2.0)                | 83 (1.5)    |
| Ophthalmic agents                           | 30 (1.2)                | 131 (2.4)   |
| Antimalarial drugs                          | 15 (0.6)                | 31 (0.6)    |
| Fluconazole                                 | 136 (5.2)               | 291 (5.2)   |
| Tamoxifen                                   | §                       | 19 (0.3)    |
| Number of non-antidiabetic drugs (mean, SD) | 10.9 (6.2)              | 12.0 (7.3)  |
| 0                                           | §                       | 31 (0.6)    |
| 1                                           | §                       | 50 (0.9)    |
| 2                                           | 46 (1.8)                | 126 (2.3)   |
| 3                                           | 94 (3.6)                | 195 (3.5)   |
| ≥4                                          | 2438 (93.6)             | 5154 (92.8) |
| Number of physician visits, mean (SD)       | 10.0 (10.4)             | 11.4 (12.3) |

Abbreviations: SD, standard deviation; GLP-1, glucagon-like peptide-1

§ Numbers <5 are not displayed, as per the confidentiality policies of the Clinical Practice Research Datalink

## SUPPLEMENTARY DATA

**Supplementary Figure 1. Forest plot summarizing the primary analysis and the analyses using negative (DPP-4 inhibitors) and positive control (insulin) exposures.**

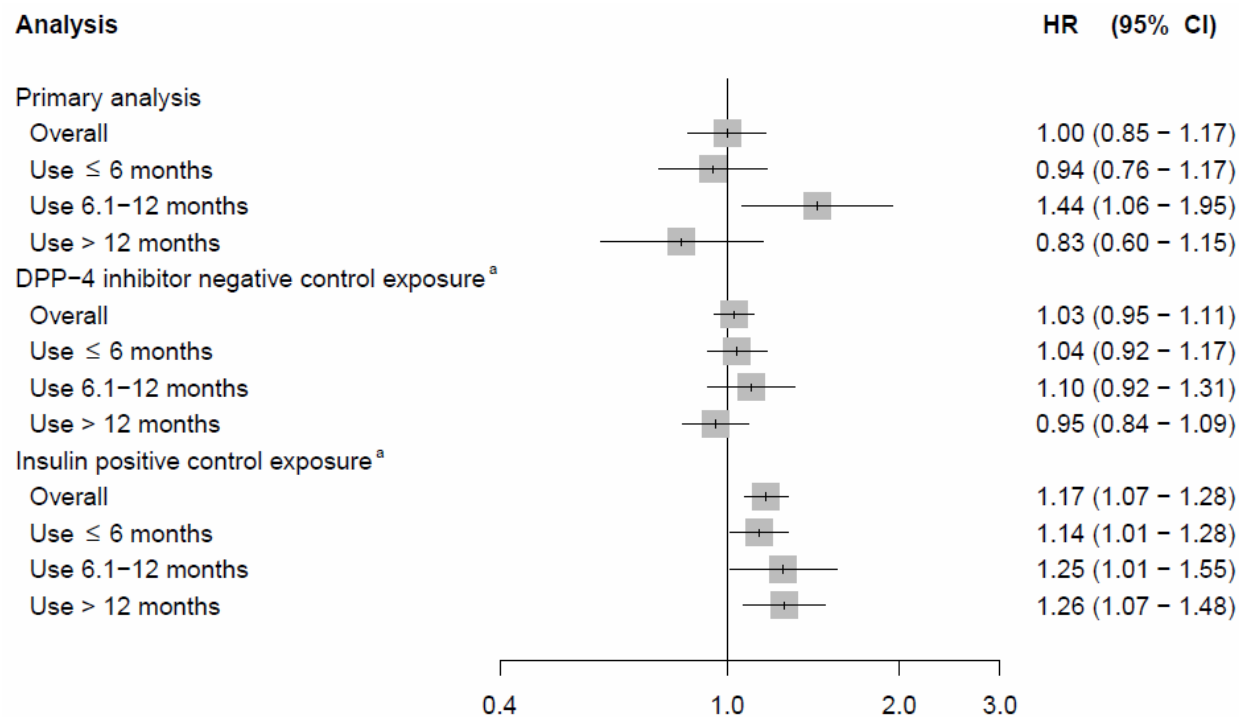

Abbreviations: DPP-4, dipeptidyl peptidase-4; HR, hazard ratio; CI, confidence interval

<sup>a</sup> Use of  $\geq 2$  oral antidiabetic drugs as comparator



## SUPPLEMENTARY DATA

**Supplementary Figure 2. Flowchart describing the construction of the study cohort for the ancillary analysis including new users of GLP-1 receptor agonists and new users of insulin**

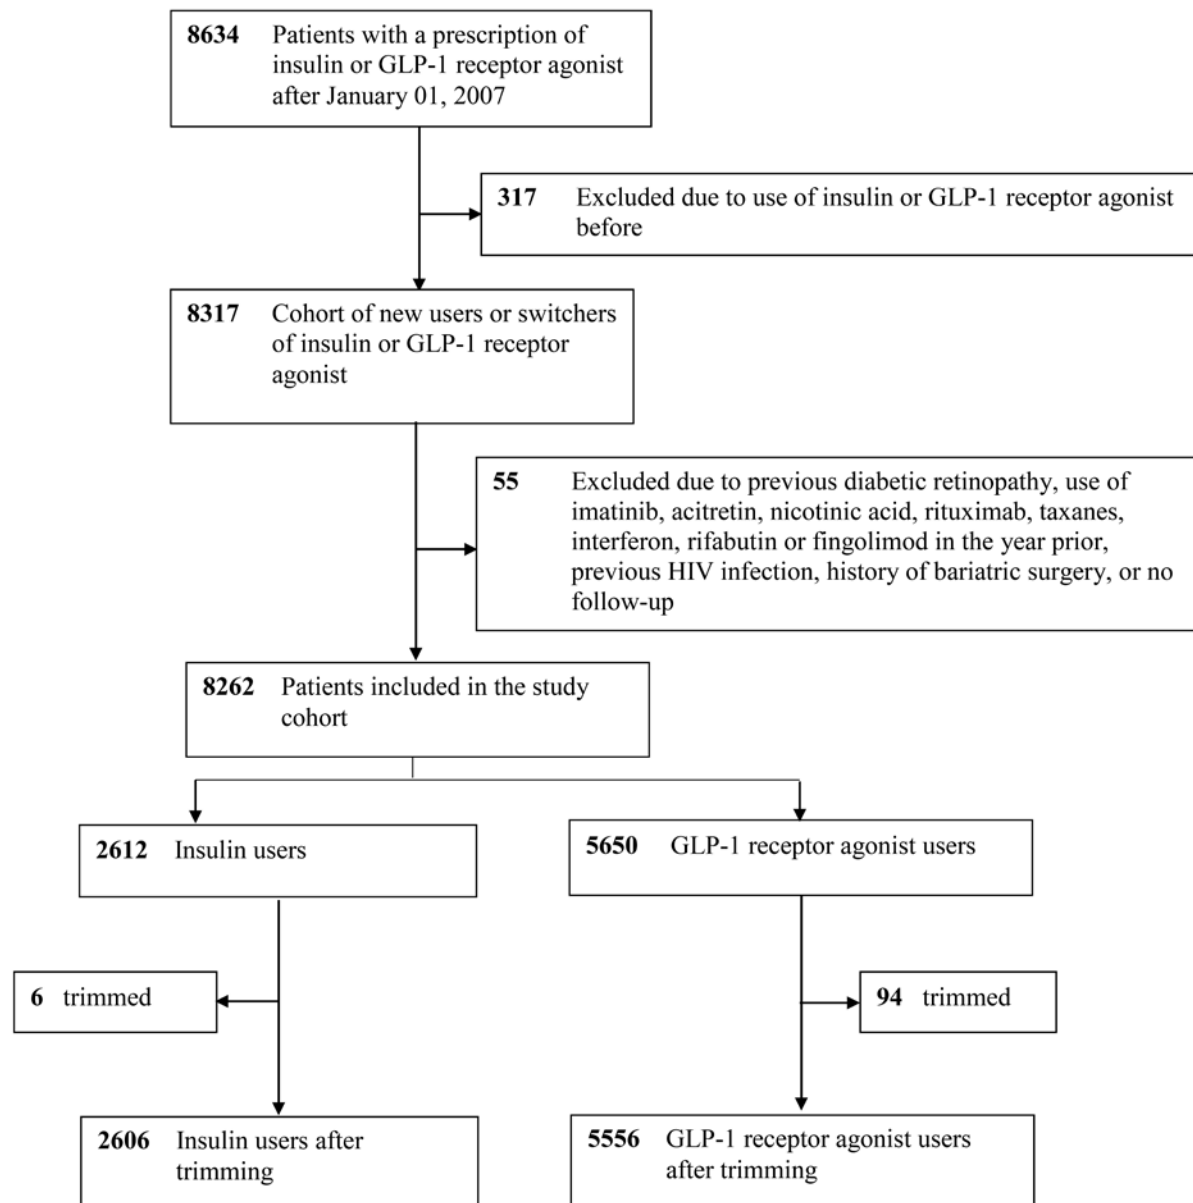

SUPPLEMENTARY DATA

**Supplementary Figure 3. Incidence rate of diabetic retinopathy in the base cohort according to duration of treated diabetes**

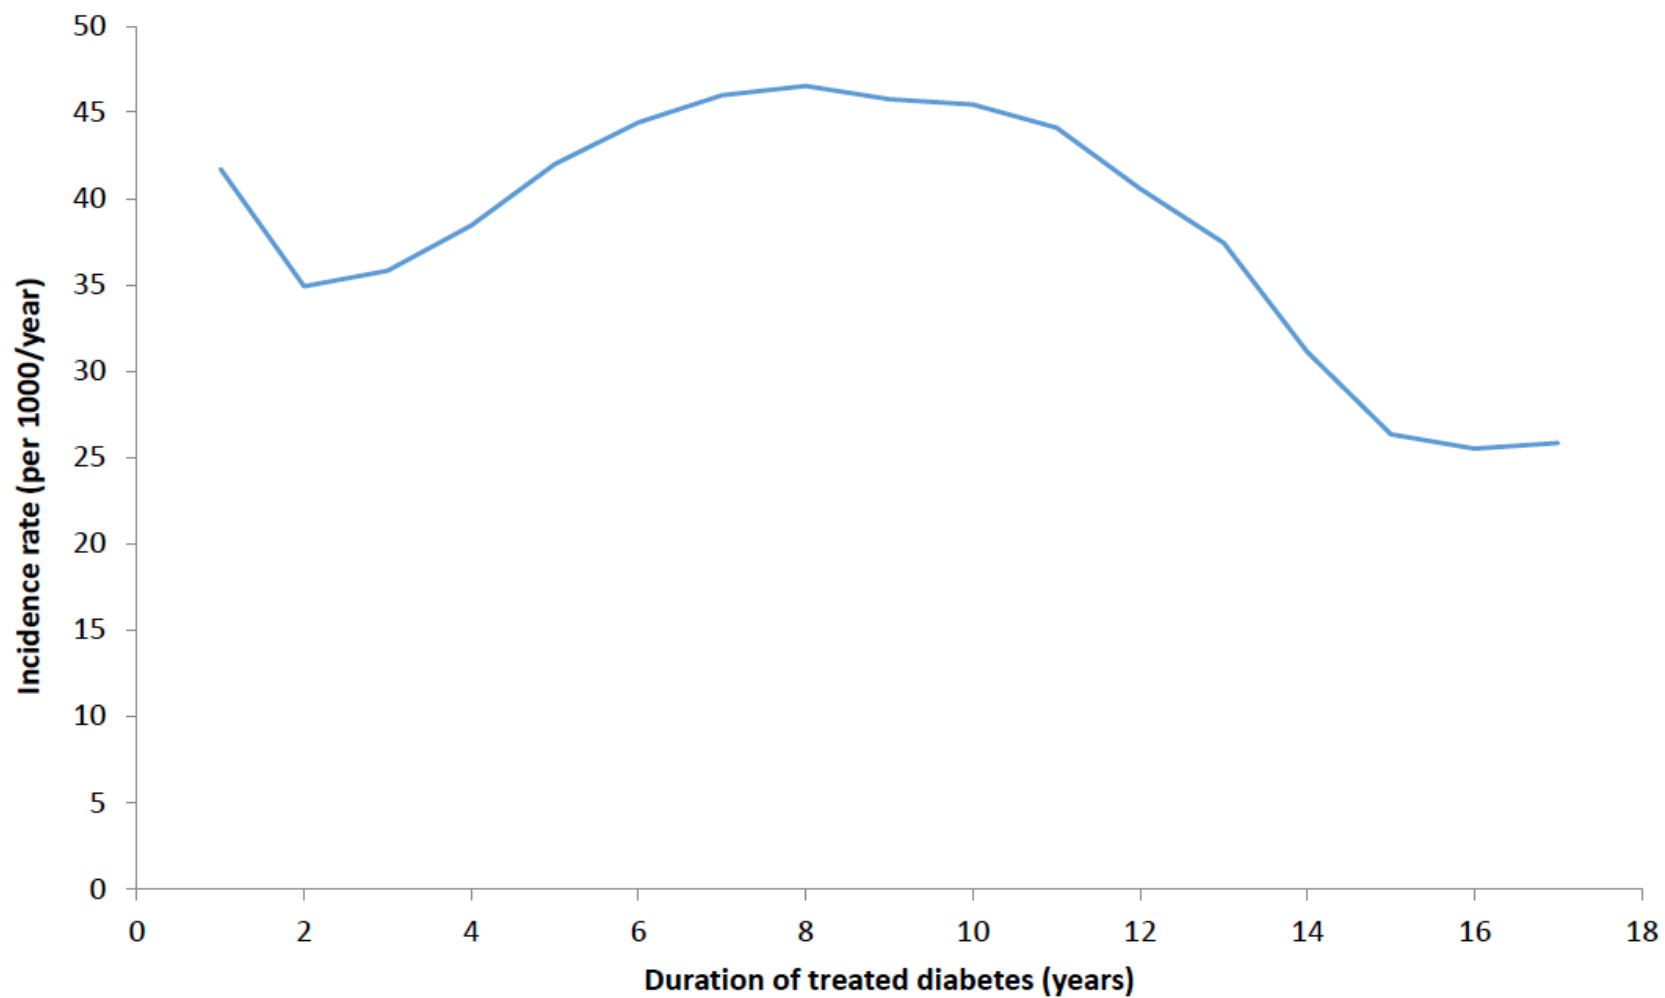

Supplement: dc172280supplementarydata.pdf [file dc172280supplementarydata.pdf]
